# Supplementary material
Source: PubMed Central journal article supplement (PMC6827840)
Supplement: jpcrr-6.4.233-Appendix_A.pdf [file jpcrr-6.4.233-Appendix_A.pdf]

# First Breath Quit Coaching Baseline Survey 2019 *(last update 1.17.19)*

|                                                                                                                                                                                   |                                                                                                                                                                                                                                                                                                                                                                                                                 |                                                                                                                                             |
|-----------------------------------------------------------------------------------------------------------------------------------------------------------------------------------|-----------------------------------------------------------------------------------------------------------------------------------------------------------------------------------------------------------------------------------------------------------------------------------------------------------------------------------------------------------------------------------------------------------------|---------------------------------------------------------------------------------------------------------------------------------------------|
| Participant ID#:<br>Date Completed:                                                                                                                                               | Completed By:<br>Date Entered into SG:                                                                                                                                                                                                                                                                                                                                                                          | Assigned to (HE):                                                                                                                           |
| <b>SMOKING HISTORY</b>                                                                                                                                                            |                                                                                                                                                                                                                                                                                                                                                                                                                 |                                                                                                                                             |
| 1. Did you smoke during any of your previous pregnancies?                                                                                                                         | <input type="checkbox"/> Yes<br><input type="checkbox"/> No<br><input type="checkbox"/> Prefer not to answer<br><input type="checkbox"/> N/A First pregnancy                                                                                                                                                                                                                                                    |                                                                                                                                             |
| 2. How old were you when you first tried cigarettes?                                                                                                                              |                                                                                                                                                                                                                                                                                                                                                                                                                 |                                                                                                                                             |
| 3. How old were you when you first started smoking daily/every day?                                                                                                               | <input type="checkbox"/> Age: _____<br><input type="checkbox"/> N/A - I have never smoked daily                                                                                                                                                                                                                                                                                                                 |                                                                                                                                             |
| 4. How many times have you made a serious attempt to quit?                                                                                                                        |                                                                                                                                                                                                                                                                                                                                                                                                                 |                                                                                                                                             |
| 5. During the period when you were smoking the most, on average, how many cigarettes per day did you smoke?                                                                       | <input type="checkbox"/> 1–5 cigarettes<br><input type="checkbox"/> 6–10<br><input type="checkbox"/> 11–15<br><input type="checkbox"/> 16–20                                                                                                                                                                                                                                                                    | <input type="checkbox"/> 21–30<br><input type="checkbox"/> 31–40<br><input type="checkbox"/> 41–50<br><input type="checkbox"/> More than 50 |
| 6. During the past 12 months, have you stopped smoking for more than one day because you were trying to quit smoking?                                                             | <input type="checkbox"/> NO<br><input type="checkbox"/> YES<br>If YES - How long did you go without smoking?<br><input type="checkbox"/> 1 day - 3 days<br><input type="checkbox"/> 4 – 6 days<br><input type="checkbox"/> 1 – 2 weeks<br><input type="checkbox"/> 3 – 4 weeks<br><input type="checkbox"/> 1 – 3 months<br><input type="checkbox"/> 4 – 6 months<br><input type="checkbox"/> More than 6 months |                                                                                                                                             |
| 7. What types of tobacco products have you used in the past 12 months? (choose all that apply)                                                                                    | <input type="checkbox"/> Cigarettes<br><input type="checkbox"/> E-Cigarettes<br><input type="checkbox"/> Cigarellos, Little Cigars (Black and Milds, Swisher Sweets), or Regular Cigars<br><input type="checkbox"/> Smokeless tobacco, snuz, chew, dissolvables<br><input type="checkbox"/> Other:                                                                                                              |                                                                                                                                             |
| <b>CURRENT SMOKING STATUS</b>                                                                                                                                                     |                                                                                                                                                                                                                                                                                                                                                                                                                 |                                                                                                                                             |
| 8. Have you smoked at all, even a single puff, in the last 7 days?<br>A. If NO, mark “none in the past 7 days”<br>B. If YES, on average how many cigarettes do you smoke per day? | <input type="checkbox"/> None<br><input type="checkbox"/> Some days, but not at all<br><input type="checkbox"/> 1–5 cigarettes<br><input type="checkbox"/> 6–10<br><input type="checkbox"/> 11–15<br><input type="checkbox"/> 16–20<br><input type="checkbox"/> 21–30<br><input type="checkbox"/> 31–40<br><input type="checkbox"/> 41+                                                                         |                                                                                                                                             |
| 9. If you did not smoke in the past 7 days – how long has it been since you smoked your last cigarette                                                                            | <input type="checkbox"/> Less than 2 weeks<br><input type="checkbox"/> 2 – 4 weeks<br><input type="checkbox"/> 1 – 3 months<br><input type="checkbox"/> 3 – 6 months<br><input type="checkbox"/> More than 6 months                                                                                                                                                                                             |                                                                                                                                             |

|                                                                        |                                                                                                                                             |                                                                                                   |
|------------------------------------------------------------------------|---------------------------------------------------------------------------------------------------------------------------------------------|---------------------------------------------------------------------------------------------------|
| 10. How soon after you wake do you smoke (on the days that you smoke)? | <input type="checkbox"/> Within 5 minutes<br><input type="checkbox"/> 6 – 30 minutes<br><input type="checkbox"/> 31 – 60 minutes            | <input type="checkbox"/> After 60 minutes<br><input type="checkbox"/> N/A – Not currently smoking |
| 11. How confident are you that you'll be smoke-free one year from now? | <input type="checkbox"/> Not at all confident<br><input type="checkbox"/> Not very confident<br><input type="checkbox"/> In the middle      | <input type="checkbox"/> Pretty confident<br><input type="checkbox"/> Very confident              |
| 12. How motivated are you to quit/remain quit?                         | <input type="checkbox"/> Not at all motivated<br><input type="checkbox"/> Not motivated very much<br><input type="checkbox"/> In the middle | <input type="checkbox"/> Motivated a little<br><input type="checkbox"/> Greatly motivated         |
| 13. How hard will it be for you to quit smoking?                       | <input type="checkbox"/> Very difficult<br><input type="checkbox"/> Somewhat difficult<br><input type="checkbox"/> In the middle            | <input type="checkbox"/> Somewhat easy<br><input type="checkbox"/> Very easy                      |

#### ENVIRONMENTAL TOBACCO SMOKE ASSESSMENT

|                                                                                                                                                           |                                                                                                                                                                                                                  |
|-----------------------------------------------------------------------------------------------------------------------------------------------------------|------------------------------------------------------------------------------------------------------------------------------------------------------------------------------------------------------------------|
| 14. Which is the best description of tobacco smoking in your home <u>CURRENTLY</u> ? (Choose one)                                                         | <input type="checkbox"/> Smoking is never allowed inside your home<br><input type="checkbox"/> Smoking is allowed only in certain rooms<br><input type="checkbox"/> Smoking is allowed in all rooms of your home |
| 15. In the past 7 days, were you exposed to someone else's tobacco smoke?                                                                                 | <input type="checkbox"/> YES<br><input type="checkbox"/> NO                                                                                                                                                      |
| 16. In the past 7 days, have you experienced eye irritation, nose irritation, coughing, wheezing or chest tightness after being exposed to tobacco smoke? | <input type="checkbox"/> YES<br><input type="checkbox"/> NO                                                                                                                                                      |

#### SOCIAL SUPPORT & STRESS

|                                                                                                                                                           |                                                                                                                                                                                                                                                                                                                                                                                                                                                                                                                                                                                                                                                                                                                                                                                                                                                                                                                                                                                                                               |                                                                                 |
|-----------------------------------------------------------------------------------------------------------------------------------------------------------|-------------------------------------------------------------------------------------------------------------------------------------------------------------------------------------------------------------------------------------------------------------------------------------------------------------------------------------------------------------------------------------------------------------------------------------------------------------------------------------------------------------------------------------------------------------------------------------------------------------------------------------------------------------------------------------------------------------------------------------------------------------------------------------------------------------------------------------------------------------------------------------------------------------------------------------------------------------------------------------------------------------------------------|---------------------------------------------------------------------------------|
| 17. How much support (day-to-day help, emotional support, etc) do you get from the people in your life?                                                   | <input type="checkbox"/> Extremely low<br><input type="checkbox"/> Fairly low<br><input type="checkbox"/> Medium                                                                                                                                                                                                                                                                                                                                                                                                                                                                                                                                                                                                                                                                                                                                                                                                                                                                                                              | <input type="checkbox"/> Fairly high<br><input type="checkbox"/> Extremely high |
| 18. What is your current stress level?                                                                                                                    | <input type="checkbox"/> Extremely low<br><input type="checkbox"/> Fairly low<br><input type="checkbox"/> Medium                                                                                                                                                                                                                                                                                                                                                                                                                                                                                                                                                                                                                                                                                                                                                                                                                                                                                                              | <input type="checkbox"/> Fairly high<br><input type="checkbox"/> Extremely high |
| 19. Have you experienced any major stressors/life changes during your pregnancy? Please respond Yes, No, or prefer not to answer (Choose all that apply.) | <input type="checkbox"/> Prefer not to answer<br><input type="checkbox"/> Single parenthood<br><input type="checkbox"/> Relationship problems<br><input type="checkbox"/> Work stress (looking for a job, job loss, issues at a job)<br><input type="checkbox"/> Daily life stress (transportation, childcare, etc)<br><input type="checkbox"/> Difficulty caring for multiple children<br><input type="checkbox"/> Housing insecurity or homelessness<br><input type="checkbox"/> Food insecurity<br><input type="checkbox"/> Financial insecurity<br><input type="checkbox"/> Abuse or Domestic Violence<br><input type="checkbox"/> Victim of a crime other than abuse or DV<br><input type="checkbox"/> Legal problems<br><input type="checkbox"/> Incarceration of someone close to you<br><input type="checkbox"/> Personal health problems<br><input type="checkbox"/> Problems with your pregnancy<br><input type="checkbox"/> Death or serious illness of friend or family member<br><input type="checkbox"/> Other: |                                                                                 |
| 20. Total # stressors                                                                                                                                     | Total # from previous question                                                                                                                                                                                                                                                                                                                                                                                                                                                                                                                                                                                                                                                                                                                                                                                                                                                                                                                                                                                                |                                                                                 |

#### MENTAL HEALTH & SUBSTANCE USE

|                                                                                        |                                                                                                                                                                        |
|----------------------------------------------------------------------------------------|------------------------------------------------------------------------------------------------------------------------------------------------------------------------|
| 21. Do you/have you ever suffered from a mental illness or behavioral health disorder? | <input type="checkbox"/> Prefer not to answer<br><input type="checkbox"/> No<br><input type="checkbox"/> Never diagnosed but suspected<br><input type="checkbox"/> Yes |
|----------------------------------------------------------------------------------------|------------------------------------------------------------------------------------------------------------------------------------------------------------------------|

|                                                                                                             |                                                                                                              |
|-------------------------------------------------------------------------------------------------------------|--------------------------------------------------------------------------------------------------------------|
| 22. Do you/have you ever had a substance use disorder or been treated for an addiction to drugs or alcohol? | <input type="checkbox"/> Prefer not to answer<br><input type="checkbox"/> No<br><input type="checkbox"/> Yes |
|-------------------------------------------------------------------------------------------------------------|--------------------------------------------------------------------------------------------------------------|

**FUTURE GOALS**

|                                  |                                                                                                                                                                                                                      |
|----------------------------------|----------------------------------------------------------------------------------------------------------------------------------------------------------------------------------------------------------------------|
| 23. What are your smoking goals? | <input type="checkbox"/> Cut down for pregnancy/lactation only<br><input type="checkbox"/> Cut down for good<br><input type="checkbox"/> Quit for pregnancy/lactation only<br><input type="checkbox"/> Quit for good |
|----------------------------------|----------------------------------------------------------------------------------------------------------------------------------------------------------------------------------------------------------------------|

**DEMOGRAPHICS**

|                                                |                                                                                         |                                                                                                              |
|------------------------------------------------|-----------------------------------------------------------------------------------------|--------------------------------------------------------------------------------------------------------------|
| 24. What type of health insurance do you have? | <input type="checkbox"/> State/Medicaid/Badger Care<br><input type="checkbox"/> Private | <input type="checkbox"/> Marketplace/ACA<br><input type="checkbox"/> None<br><input type="checkbox"/> Other: |
|------------------------------------------------|-----------------------------------------------------------------------------------------|--------------------------------------------------------------------------------------------------------------|

|                                   |                                                             |
|-----------------------------------|-------------------------------------------------------------|
| 25. Do you currently receive WIC? | <input type="checkbox"/> Yes<br><input type="checkbox"/> No |
|-----------------------------------|-------------------------------------------------------------|

|                                            |                                                                                                                                             |                                                                                                                                           |
|--------------------------------------------|---------------------------------------------------------------------------------------------------------------------------------------------|-------------------------------------------------------------------------------------------------------------------------------------------|
| 26. What is your current household income? | <input type="checkbox"/> Less than \$10,000<br><input type="checkbox"/> \$10,000 - \$19,999<br><input type="checkbox"/> \$20,000 - \$29,999 | <input type="checkbox"/> \$30,000 - \$49,000<br><input type="checkbox"/> \$50,000 - \$79,000<br><input type="checkbox"/> \$80,000 or more |
|--------------------------------------------|---------------------------------------------------------------------------------------------------------------------------------------------|-------------------------------------------------------------------------------------------------------------------------------------------|

|                                                |                                                                                                                                                                                                                                                                                                            |
|------------------------------------------------|------------------------------------------------------------------------------------------------------------------------------------------------------------------------------------------------------------------------------------------------------------------------------------------------------------|
| 27. How many years of school did you complete? | <input type="checkbox"/> Less than high school<br><input type="checkbox"/> Some high school<br><input type="checkbox"/> High school diploma or GED<br><input type="checkbox"/> Some college or 2-year degree<br><input type="checkbox"/> College degree<br><input type="checkbox"/> Post-college education |
|------------------------------------------------|------------------------------------------------------------------------------------------------------------------------------------------------------------------------------------------------------------------------------------------------------------------------------------------------------------|

|                       |                                                                                                                                               |
|-----------------------|-----------------------------------------------------------------------------------------------------------------------------------------------|
| 28. Employment Status | <input type="checkbox"/> Not currently employed<br><input type="checkbox"/> Employed part-time<br><input type="checkbox"/> Employed full-time |
|-----------------------|-----------------------------------------------------------------------------------------------------------------------------------------------|

|                         |                                                                                                                                                                             |
|-------------------------|-----------------------------------------------------------------------------------------------------------------------------------------------------------------------------|
| 29. Relationship Status | <input type="checkbox"/> Single<br><input type="checkbox"/> Married or in a committed relationship<br><input type="checkbox"/> Widowed<br><input type="checkbox"/> Divorced |
|-------------------------|-----------------------------------------------------------------------------------------------------------------------------------------------------------------------------|

|                                                                     |                                                                                                                         |
|---------------------------------------------------------------------|-------------------------------------------------------------------------------------------------------------------------|
| 30. How many people live in your home (including your unborn baby)? | A. Total # in household _____<br>B. # of adults including adult children (18+) _____<br>C. # of children (<18 yo) _____ |
|---------------------------------------------------------------------|-------------------------------------------------------------------------------------------------------------------------|

|                                                            |                                                                                                                                                                   |
|------------------------------------------------------------|-------------------------------------------------------------------------------------------------------------------------------------------------------------------|
| 31. How many adults in your household (besides you) smoke? | <input type="checkbox"/> None<br><input type="checkbox"/> Some but not all<br><input type="checkbox"/> All<br><input type="checkbox"/> No other adults in my home |
|------------------------------------------------------------|-------------------------------------------------------------------------------------------------------------------------------------------------------------------|

**GIFT CARDS**

| Tracking # | Gift Card # | Reason |
|------------|-------------|--------|
|            |             | BL     |

**NOTES FOR ASSIGNED HE**

|  |
|--|
|  |
|--|
