# Supplementary material
Source: PubMed Central journal article supplement (PMC6827840)
Supplement: jpcrr-6.4.233-Appendix_B.pdf [file jpcrr-6.4.233-Appendix_B.pdf]

**First Breath Quit Coaching Surveys (HV1, HV2, and HV3) – last update 1/17/19**

**Home Visit #1 – Prenatal Survey (Approx 7 months pregnant)**

|                                                                                                             |  |                                                                                                                                                                                                                                                                                                                                         |      |                                                                           |        |                        |
|-------------------------------------------------------------------------------------------------------------|--|-----------------------------------------------------------------------------------------------------------------------------------------------------------------------------------------------------------------------------------------------------------------------------------------------------------------------------------------|------|---------------------------------------------------------------------------|--------|------------------------|
| Participant ID#:                                                                                            |  | Health Educator:                                                                                                                                                                                                                                                                                                                        |      |                                                                           |        |                        |
| Date Completed:                                                                                             |  | Date Entered into SG:                                                                                                                                                                                                                                                                                                                   |      |                                                                           |        |                        |
| <b>CURRENT SMOKING STATUS</b>                                                                               |  |                                                                                                                                                                                                                                                                                                                                         |      |                                                                           |        |                        |
| 1. CO Test                                                                                                  |  | Result #1 _____ppm                                                                                                                                                                                                                                                                                                                      |      | Re-test Result (if needed) #2 _____ppm                                    |        |                        |
| 2. Have you smoked at all, even a single puff, in the last 7 days?                                          |  | <input type="checkbox"/> None<br><input type="checkbox"/> Some days, but not at all<br><input type="checkbox"/> 1–5 cigarettes<br><input type="checkbox"/> 6–10<br><input type="checkbox"/> 11–15<br><input type="checkbox"/> 16–20<br><input type="checkbox"/> 21–30<br><input type="checkbox"/> 31–40<br><input type="checkbox"/> 41+ |      |                                                                           |        |                        |
| a. If NO, mark “none in the past 7 days”<br>b. If YES, on average how many cigarettes do you smoke per day? |  |                                                                                                                                                                                                                                                                                                                                         |      |                                                                           |        |                        |
| 3. If you did not smoke in the past 7 days – how long has it been since you smoked your last cigarette      |  | <input type="checkbox"/> Less than 2 weeks<br><input type="checkbox"/> 2 – 4 weeks<br><input type="checkbox"/> 1 – 3 months<br><input type="checkbox"/> 3 – 6 months<br><input type="checkbox"/> More than 6 months                                                                                                                     |      |                                                                           |        |                        |
| <b>FAGERSTROM TEST FOR NICOTINE DEPENDENCE – ENTER ONLY Q4-5 INTO SURVEYGIZMO</b>                           |  |                                                                                                                                                                                                                                                                                                                                         |      |                                                                           |        |                        |
| How soon after waking do you smoke your first cigarette?                                                    |  | <input type="checkbox"/> Within 5 minutes (3)<br><input type="checkbox"/> 5 – 30 mins (2)<br><input type="checkbox"/> 31- 60 mins (1)                                                                                                                                                                                                   |      |                                                                           |        |                        |
| Do you find it difficult to refrain from smoking in places where it is forbidden (church, library, etc)     |  | <input type="checkbox"/> Yes (1)<br><input type="checkbox"/> No (0)                                                                                                                                                                                                                                                                     |      |                                                                           |        |                        |
| Which cigarette would you hate to give up?                                                                  |  | <input type="checkbox"/> The first in the morning (1)<br><input type="checkbox"/> Any other (0)                                                                                                                                                                                                                                         |      |                                                                           |        |                        |
| How many cigarettes per day do you smoke?                                                                   |  | <input type="checkbox"/> 10 or less (0)<br><input type="checkbox"/> 11-20 (1)<br><input type="checkbox"/> 21-30 (2)<br><input type="checkbox"/> 31 or more (3)                                                                                                                                                                          |      |                                                                           |        |                        |
| Do you smoke more frequently in the morning?                                                                |  | <input type="checkbox"/> Yes (1)<br><input type="checkbox"/> No (0)                                                                                                                                                                                                                                                                     |      |                                                                           |        |                        |
| Do you smoke even if you are sick in bed most of the day?                                                   |  | <input type="checkbox"/> Yes (1)<br><input type="checkbox"/> No (0)                                                                                                                                                                                                                                                                     |      |                                                                           |        |                        |
| 4. Total Fagerstrom Score                                                                                   |  |                                                                                                                                                                                                                                                                                                                                         |      |                                                                           |        |                        |
| 5. Dependence Level                                                                                         |  | <input type="checkbox"/> 1-2 Low<br><input type="checkbox"/> 3-4 Low-Moderate                                                                                                                                                                                                                                                           |      | <input type="checkbox"/> 5-7 Moderate<br><input type="checkbox"/> 8+ High |        |                        |
| <b>NIDA QUICK SCREEN</b>                                                                                    |  |                                                                                                                                                                                                                                                                                                                                         |      |                                                                           |        |                        |
| In the past year, how often have you used the following?                                                    |  | Never                                                                                                                                                                                                                                                                                                                                   | 1-2X | Monthly                                                                   | Weekly | Daily/<br>Almost Daily |
| Alcohol (4 or more drinks per day)                                                                          |  |                                                                                                                                                                                                                                                                                                                                         |      |                                                                           |        |                        |
| Prescription Drugs for Non-medical reasons                                                                  |  |                                                                                                                                                                                                                                                                                                                                         |      |                                                                           |        |                        |
| Illegal Drugs                                                                                               |  |                                                                                                                                                                                                                                                                                                                                         |      |                                                                           |        |                        |

**PHQ9 - ENTER ONLY Q 6-8 INTO SURVEYGIZMO**

| Over the last 2 weeks, how often have you been bothered by any of the following problems?                                                                                | Not at all                                                                                   | Several days | More than half the days                                                                 | Nearly every day |
|--------------------------------------------------------------------------------------------------------------------------------------------------------------------------|----------------------------------------------------------------------------------------------|--------------|-----------------------------------------------------------------------------------------|------------------|
| Little interest or pleasure in doing things                                                                                                                              | 0                                                                                            | 1            | 2                                                                                       | 3                |
| Feeling down, depressed, or hopeless                                                                                                                                     | 0                                                                                            | 1            | 2                                                                                       | 3                |
| Trouble falling or staying asleep, or sleeping too much                                                                                                                  | 0                                                                                            | 1            | 2                                                                                       | 3                |
| Feeling tired or having little energy                                                                                                                                    | 0                                                                                            | 1            | 2                                                                                       | 3                |
| Poor appetite or overeating                                                                                                                                              | 0                                                                                            | 1            | 2                                                                                       | 3                |
| Feeling bad about yourself — or that you are a failure or have let yourself or your family down                                                                          | 0                                                                                            | 1            | 2                                                                                       | 3                |
| Trouble concentrating on things, such as reading the newspaper or watching television                                                                                    | 0                                                                                            | 1            | 2                                                                                       | 3                |
| Moving or speaking so slowly that other people could have noticed? Or the opposite — being so fidgety or restless that you have been moving around a lot more than usual | 0                                                                                            | 1            | 2                                                                                       | 3                |
| Thoughts that you would be better off dead or of hurting yourself in some way                                                                                            | 0                                                                                            | 1            | 2                                                                                       | 3                |
| 6. If you checked off any problems, how difficult have these problems made it for you to do your work, take care of things at home, or get along with other people?      | <input type="checkbox"/> Not at all difficult<br><input type="checkbox"/> Somewhat difficult |              | <input type="checkbox"/> Very difficult<br><input type="checkbox"/> Extremely difficult |                  |
| 7. TOTAL PHQ9 SCORE                                                                                                                                                      |                                                                                              |              |                                                                                         |                  |

8. Depression Severity Interpretation       Minimal (1-4)       Moderate (10-14)       E. Severe (20-27)  
 Mild (5-9)       Moderately severe (15-19)

**GAD7 – ONLY ENTER Q 9-11 INTO SURVEYGIZMO**

| Over the last 2 weeks, how often have you been bothered by any of the following problems?                                                                           | Not at all                                                                                   | Several days | More than half the days                                                                 | Nearly every day |
|---------------------------------------------------------------------------------------------------------------------------------------------------------------------|----------------------------------------------------------------------------------------------|--------------|-----------------------------------------------------------------------------------------|------------------|
| Feeling nervous, anxious, or on edge                                                                                                                                | 0                                                                                            | 1            | 2                                                                                       | 3                |
| Not being able to stop or control worrying                                                                                                                          | 0                                                                                            | 1            | 2                                                                                       | 3                |
| Worrying too much about different things                                                                                                                            | 0                                                                                            | 1            | 2                                                                                       | 3                |
| Trouble relaxing                                                                                                                                                    | 0                                                                                            | 1            | 2                                                                                       | 3                |
| Being so restless that it's hard to sit still                                                                                                                       | 0                                                                                            | 1            | 2                                                                                       | 3                |
| Becoming easily annoyed or irritable                                                                                                                                | 0                                                                                            | 1            | 2                                                                                       | 3                |
| Feeling afraid as if something awful might happen                                                                                                                   | 0                                                                                            | 1            | 2                                                                                       | 3                |
| 9. If you checked off any problems, how difficult have these problems made it for you to do your work, take care of things at home, or get along with other people? | <input type="checkbox"/> Not at all difficult<br><input type="checkbox"/> Somewhat difficult |              | <input type="checkbox"/> Very difficult<br><input type="checkbox"/> Extremely difficult |                  |
| 10. TOTAL GAD7 SCORE                                                                                                                                                |                                                                                              |              |                                                                                         |                  |

11. GAD7 Interpretation       Mild (5-9)       Moderate (10-14)       Severe (15+)

**HITS Domestic Violence Screening Tool - ENTER ONLY Q 13-14 INTO SURVEYGIZMO**

| How often does your partner | Never | Rarely | Sometimes | Fairly Often | Frequently |
|-----------------------------|-------|--------|-----------|--------------|------------|
| Physically hurt you         | 1     | 2      | 3         | 4            | 5          |
| Insult or talk down to you  | 1     | 2      | 3         | 4            | 5          |
| Threaten you with harm      | 1     | 2      | 3         | 4            | 5          |
| Scream or curse at you      | 1     | 2      | 3         | 4            | 5          |

12. TOTAL HITS Score

13. DV Risk Level

- Low Risk (0-9)
- High Risk (10-20)

**GIFT CARDS**

| Tracking # | Gift Card # | Reason          |
|------------|-------------|-----------------|
|            |             | HV1             |
|            |             | HV1-CO (passed) |

## Home Visit #2 - Early Postpartum Survey (1 month postpartum)

|                  |                       |
|------------------|-----------------------|
| Participant ID#: | Health Educator:      |
| Date Completed:  | Date Entered into SG: |

### CURRENT SMOKING STATUS

|                                                                                                             |                                                                                                                                                                                                                                                                                                                                         |
|-------------------------------------------------------------------------------------------------------------|-----------------------------------------------------------------------------------------------------------------------------------------------------------------------------------------------------------------------------------------------------------------------------------------------------------------------------------------|
| 1. CO result                                                                                                | Result #1 _____ppm    Re-test Result (if needed) #2 _____ppm                                                                                                                                                                                                                                                                            |
| 2. Have you smoked at all, even a single puff, in the last 7 days?                                          | <input type="checkbox"/> None<br><input type="checkbox"/> Some days, but not at all<br><input type="checkbox"/> 1–5 cigarettes<br><input type="checkbox"/> 6–10<br><input type="checkbox"/> 11–15<br><input type="checkbox"/> 16–20<br><input type="checkbox"/> 21–30<br><input type="checkbox"/> 31–40<br><input type="checkbox"/> 41+ |
| a. If NO, mark “none in the past 7 days”<br>b. If YES, on average how many cigarettes do you smoke per day? |                                                                                                                                                                                                                                                                                                                                         |
| 3. If you did not smoke in the past 7 days – how long has it been since you smoked your last cigarette      | <input type="checkbox"/> Less than 2 weeks<br><input type="checkbox"/> 2 – 4 weeks<br><input type="checkbox"/> 1 – 3 months<br><input type="checkbox"/> 3 – 6 months<br><input type="checkbox"/> More than 6 months                                                                                                                     |

### NIDA QUICK SCREEN

| In the past year, how often have you used the following? | Never | 1-2X | Monthly | Weekly | Daily/<br>Almost Daily |
|----------------------------------------------------------|-------|------|---------|--------|------------------------|
| Alcohol (4 or more drinks per day)                       |       |      |         |        |                        |
| Prescription Drugs for Non-medical reasons               |       |      |         |        |                        |
| Illegal Drugs                                            |       |      |         |        |                        |

### PHQ9 - ENTER ONLY Q 4-6 INTO SURVEYGIZMO

| Over the last 2 weeks, how often have you been bothered by any of the following problems?                                                                                | Not at all | Several days | More than half the days | Nearly every day |
|--------------------------------------------------------------------------------------------------------------------------------------------------------------------------|------------|--------------|-------------------------|------------------|
| Little interest or pleasure in doing things                                                                                                                              | 0          | 1            | 2                       | 3                |
| Feeling down, depressed, or hopeless                                                                                                                                     | 0          | 1            | 2                       | 3                |
| Trouble falling or staying asleep, or sleeping too much                                                                                                                  | 0          | 1            | 2                       | 3                |
| Feeling tired or having little energy                                                                                                                                    | 0          | 1            | 2                       | 3                |
| Poor appetite or overeating                                                                                                                                              | 0          | 1            | 2                       | 3                |
| Feeling bad about yourself — or that you are a failure or have let yourself or your family down                                                                          | 0          | 1            | 2                       | 3                |
| Trouble concentrating on things, such as reading the newspaper or watching television                                                                                    | 0          | 1            | 2                       | 3                |
| Moving or speaking so slowly that other people could have noticed? Or the opposite — being so fidgety or restless that you have been moving around a lot more than usual | 0          | 1            | 2                       | 3                |
| Thoughts that you would be better off dead or of hurting                                                                                                                 | 0          | 1            | 2                       | 3                |

|                                                                                                                                                                     |                                                                                                                                                                                                                                |              |                         |                  |
|---------------------------------------------------------------------------------------------------------------------------------------------------------------------|--------------------------------------------------------------------------------------------------------------------------------------------------------------------------------------------------------------------------------|--------------|-------------------------|------------------|
| yourself in some way                                                                                                                                                |                                                                                                                                                                                                                                |              |                         |                  |
| 4. If you checked off any problems, how difficult have these problems made it for you to do your work, take care of things at home, or get along with other people? | <input type="checkbox"/> Not at all difficult<br><input type="checkbox"/> Somewhat difficult<br><input type="checkbox"/> Very difficult<br><input type="checkbox"/> Extremely difficult                                        |              |                         |                  |
| 5. TOTAL PHQ9 SCORE                                                                                                                                                 |                                                                                                                                                                                                                                |              |                         |                  |
| 6. Depression Severity Interpretation                                                                                                                               | <input type="checkbox"/> Minimal (1-4)<br><input type="checkbox"/> Mild (5-9)<br><input type="checkbox"/> Moderate (10-14)<br><input type="checkbox"/> Moderately severe (15-19)<br><input type="checkbox"/> E. Severe (20-27) |              |                         |                  |
| <b>GAD7 – ONLY ENTER Q7-9 INTO SURVEYGIZMO</b>                                                                                                                      |                                                                                                                                                                                                                                |              |                         |                  |
| Over the last 2 weeks, how often have you been bothered by any of the following problems?                                                                           | Not at all                                                                                                                                                                                                                     | Several days | More than half the days | Nearly every day |
| Feeling nervous, anxious, or on edge                                                                                                                                | 0                                                                                                                                                                                                                              | 1            | 2                       | 3                |
| Not being able to stop or control worrying                                                                                                                          | 0                                                                                                                                                                                                                              | 1            | 2                       | 3                |
| Worrying too much about different things                                                                                                                            | 0                                                                                                                                                                                                                              | 1            | 2                       | 3                |
| Trouble relaxing                                                                                                                                                    | 0                                                                                                                                                                                                                              | 1            | 2                       | 3                |
| Being so restless that it's hard to sit still                                                                                                                       | 0                                                                                                                                                                                                                              | 1            | 2                       | 3                |
| Becoming easily annoyed or irritable                                                                                                                                | 0                                                                                                                                                                                                                              | 1            | 2                       | 3                |
| Feeling afraid as if something awful might happen                                                                                                                   | 0                                                                                                                                                                                                                              | 1            | 2                       | 3                |
| 7. If you checked off any problems, how difficult have these problems made it for you to do your work, take care of things at home, or get along with other people? | <input type="checkbox"/> Not at all difficult<br><input type="checkbox"/> Somewhat difficult<br><input type="checkbox"/> Very difficult<br><input type="checkbox"/> Extremely difficult                                        |              |                         |                  |
| 8. TOTAL GAD7 SCORE                                                                                                                                                 |                                                                                                                                                                                                                                |              |                         |                  |
| 9. GAD7 Interpretation                                                                                                                                              | <input type="checkbox"/> Mild (5-9)<br><input type="checkbox"/> Moderate (10-14)<br><input type="checkbox"/> Severe (15+)                                                                                                      |              |                         |                  |
| <b>GIFT CARDS</b>                                                                                                                                                   |                                                                                                                                                                                                                                |              |                         |                  |
| Tracking #                                                                                                                                                          | Gift Card #                                                                                                                                                                                                                    |              | Reason                  |                  |
|                                                                                                                                                                     |                                                                                                                                                                                                                                |              | HV2                     |                  |
|                                                                                                                                                                     |                                                                                                                                                                                                                                |              | HV2-CO (passed)         |                  |

# Home Visit #3 - Late Postpartum Survey (6 months postpartum)

Participant ID#:

Health Educator:

Date Completed:

Date Entered into SG:

## SMOKING ASSESSMENT

- |                                                                                                                                                                                   |                                                                                                                                                                                                                                                                                                                                                                                                                                                                                                                                                      |                                                                                            |
|-----------------------------------------------------------------------------------------------------------------------------------------------------------------------------------|------------------------------------------------------------------------------------------------------------------------------------------------------------------------------------------------------------------------------------------------------------------------------------------------------------------------------------------------------------------------------------------------------------------------------------------------------------------------------------------------------------------------------------------------------|--------------------------------------------------------------------------------------------|
| 1. CO result                                                                                                                                                                      | Result #1 _____ppm                                                                                                                                                                                                                                                                                                                                                                                                                                                                                                                                   | Re-test Result (if needed) #2 _____ppm                                                     |
| 2. What statement best describes your tobacco use since you became pregnant? (choose only one)                                                                                    | A. I smoked throughout my pregnancy and after delivery; I currently smoke<br>B. I quit while pregnant but relapsed before I delivered; I currently smoke<br>C. I quit while pregnant but relapsed after I delivered; I currently smoke<br>D. I quit during pregnancy and stayed quit; I currently do not smoke<br>E. I didn't quit completely while pregnant, fully quit after delivery but then relapsed; I currently smoke<br>F. I didn't quit completely while pregnant, fully quit after delivery and have stayed quit; I currently do not smoke |                                                                                            |
| 3. Since you became pregnant, what is the longest you went without smoking?                                                                                                       | _____ #days    OR    N/A - I quit smoking and haven't started again                                                                                                                                                                                                                                                                                                                                                                                                                                                                                  |                                                                                            |
| 4. Have you smoked at all, even a single puff, in the last 7 days?<br>a. If NO, mark "none in the past 7 days"<br>b. If YES, on average how many cigarettes do you smoke per day? | 10. None<br>11. Some days, but not at all<br>12. 1-5 cigarettes<br>13. 6-10<br>14. 11-15<br>15. 16-20<br>16. 21-30<br>17. 31-40<br>18. 41+                                                                                                                                                                                                                                                                                                                                                                                                           |                                                                                            |
| 5. If you did not smoke in the past 7 days – how long has it been since you smoked your last cigarette                                                                            | <input type="checkbox"/> Less than 2 weeks<br><input type="checkbox"/> 2 – 4 weeks<br><input type="checkbox"/> 1 – 3 months<br><input type="checkbox"/> 3 – 6 months<br><input type="checkbox"/> More than 6 months                                                                                                                                                                                                                                                                                                                                  |                                                                                            |
| 6. How soon after you wake do you smoke (on the days that you smoke)?                                                                                                             | <input type="checkbox"/> Within 5 minutes<br><input type="checkbox"/> 6 – 30 minutes<br><input type="checkbox"/> 31 – 60 minutes                                                                                                                                                                                                                                                                                                                                                                                                                     | <input type="checkbox"/> After 60 minutes<br><input type="checkbox"/> N/A – I didn't smoke |
| 7. How confident are you that you will be smoke-free one year from now?                                                                                                           | <input type="checkbox"/> Not at all confident<br><input type="checkbox"/> Not very confident<br><input type="checkbox"/> In the middle                                                                                                                                                                                                                                                                                                                                                                                                               | <input type="checkbox"/> Pretty confident<br><input type="checkbox"/> Very confident       |
| 8. How motivated are you to quit/remain quit?                                                                                                                                     | <input type="checkbox"/> Not at all motivated<br><input type="checkbox"/> Not motivated very much<br><input type="checkbox"/> In the middle                                                                                                                                                                                                                                                                                                                                                                                                          | <input type="checkbox"/> Motivated a little<br><input type="checkbox"/> Greatly motivated  |

## ENVIRONMENTAL TOBACCO SMOKE ASSESSMENT

- |                                                                                                    |                                                                                                                                                                                                                  |
|----------------------------------------------------------------------------------------------------|------------------------------------------------------------------------------------------------------------------------------------------------------------------------------------------------------------------|
| 9. Which is the best description of tobacco smoking in your home <u>CURRENTLY</u> ? (Choose one)   | <input type="checkbox"/> Smoking is never allowed inside your home<br><input type="checkbox"/> Smoking is allowed only in certain rooms<br><input type="checkbox"/> Smoking is allowed in all rooms of your home |
| 10. In the past seven days, were you or your baby exposed to someone else's tobacco smoke at home? | A. Participant    YES    NO<br>B. Baby            YES    NO                                                                                                                                                      |

|                                                                                                                                                                      |                                                                                                                                                                                                                                                                                                                                                                                                                                                        |
|----------------------------------------------------------------------------------------------------------------------------------------------------------------------|--------------------------------------------------------------------------------------------------------------------------------------------------------------------------------------------------------------------------------------------------------------------------------------------------------------------------------------------------------------------------------------------------------------------------------------------------------|
| 11. In the past 7 days, did you or your baby experience eye irritation, nose irritation, coughing, wheezing or chest tightness after being exposed to tobacco smoke? | A. Participant YES NO<br>B. Baby YES NO                                                                                                                                                                                                                                                                                                                                                                                                                |
| <b>MATERNAL &amp; CHILD HEALTH OUTCOMES</b>                                                                                                                          |                                                                                                                                                                                                                                                                                                                                                                                                                                                        |
| 12. How many weeks gestation was baby born?                                                                                                                          | _____ weeks                                                                                                                                                                                                                                                                                                                                                                                                                                            |
| 13. What type of delivery did you have?                                                                                                                              | <input type="checkbox"/> Planned C-Section<br><input type="checkbox"/> Unplanned/Emergency C-Section<br><input type="checkbox"/> Vaginal Delivery                                                                                                                                                                                                                                                                                                      |
| 14. What was baby's birth weight?                                                                                                                                    | _____ lbs, _____ oz or Unknown                                                                                                                                                                                                                                                                                                                                                                                                                         |
| 15. What was baby's birth length?                                                                                                                                    | _____ inches or Unknown                                                                                                                                                                                                                                                                                                                                                                                                                                |
| 16. Did you feed your baby breastmilk?                                                                                                                               | <input type="checkbox"/> Yes<br>a. How long?<br>i. <1 week<br>ii. <1 month<br>iii. 1 – 3 months<br>iv. 3 - 6 months<br>v. Still feeding baby breastmilk<br><input type="checkbox"/> No                                                                                                                                                                                                                                                                 |
| 17. Have you experienced any of the following (during any of your pregnancies)?                                                                                      | A. Prefer not to answer<br>B. Preterm labor YES NO<br>C. Miscarriage YES NO<br>D. Stillbirth YES NO                                                                                                                                                                                                                                                                                                                                                    |
| 18. Have any of your children experienced any of the following?                                                                                                      | A. Prefer not to answer<br>B. Asthma YES NO<br>C. Cleft Palate/Lip YES NO<br>D. Chronic Ear Infection YES NO<br>E. Chronic Bronchitis YES NO<br>F. Chronic Pneumonia YES NO<br>G. SIDS YES NO                                                                                                                                                                                                                                                          |
| <b>SOCIAL SUPPORT &amp; STRESS</b>                                                                                                                                   |                                                                                                                                                                                                                                                                                                                                                                                                                                                        |
| 19. How much support (day-to-day help, emotional support, etc) do you get from the people in your life?                                                              | <input type="checkbox"/> Extremely low<br><input type="checkbox"/> Fairly low<br><input type="checkbox"/> Medium<br><input type="checkbox"/> Fairly high<br><input type="checkbox"/> Extremely high                                                                                                                                                                                                                                                    |
| 20. What is your current stress level?                                                                                                                               | <input type="checkbox"/> Extremely low<br><input type="checkbox"/> Fairly low<br><input type="checkbox"/> Medium/Normal<br><input type="checkbox"/> Fairly high<br><input type="checkbox"/> Extremely high                                                                                                                                                                                                                                             |
| 21. Have you experienced any major stressors/life changes since your baby was born? Choose all that apply.                                                           | <input type="checkbox"/> Prefer not to answer<br><input type="checkbox"/> Single parenthood<br><input type="checkbox"/> Relationship problems<br><input type="checkbox"/> Work stress (looking for a job, job loss, issues at a job)<br><input type="checkbox"/> Daily life stress (transportation, childcare, etc)<br><input type="checkbox"/> Difficulty caring for multiple children<br><input type="checkbox"/> Housing insecurity or homelessness |

- Food insecurity
- Financial insecurity
- Abuse or Domestic Violence
- Legal problems
- Incarceration of someone close to you
- Personal health problems
- Problems with your pregnancy
- Death or serious illness of friend or family member
- Other:
- Other:

22. Total number of major life stressors Total # from previous question:

**PHQ9 - ENTER ONLY Q 6-8 INTO SURVEYGIZMO**

| Over the last 2 weeks, how often have you been bothered by any of the following problems?                                                                                | Not at all | Several days | More than half the days | Nearly every day |
|--------------------------------------------------------------------------------------------------------------------------------------------------------------------------|------------|--------------|-------------------------|------------------|
| Little interest or pleasure in doing things                                                                                                                              | 0          | 1            | 2                       | 3                |
| Feeling down, depressed, or hopeless                                                                                                                                     | 0          | 1            | 2                       | 3                |
| Trouble falling or staying asleep, or sleeping too much                                                                                                                  | 0          | 1            | 2                       | 3                |
| Feeling tired or having little energy                                                                                                                                    | 0          | 1            | 2                       | 3                |
| Poor appetite or overeating                                                                                                                                              | 0          | 1            | 2                       | 3                |
| Feeling bad about yourself — or that you are a failure or have let yourself or your family down                                                                          | 0          | 1            | 2                       | 3                |
| Trouble concentrating on things, such as reading the newspaper or watching television                                                                                    | 0          | 1            | 2                       | 3                |
| Moving or speaking so slowly that other people could have noticed? Or the opposite — being so fidgety or restless that you have been moving around a lot more than usual | 0          | 1            | 2                       | 3                |
| Thoughts that you would be better off dead or of hurting yourself in some way                                                                                            | 0          | 1            | 2                       | 3                |

23. If you checked off any problems, how difficult have these problems made it for you to do your work, take care of things at home, or get along with other people?

Not at all difficult       Very difficult  
 Somewhat difficult       Extremely difficult

24. TOTAL PHQ9 SCORE

25. Depression Severity Interpretation       Minimal (1-4)       Moderate (10-14)       E. Severe (20-27)  
 Mild (5-9)       Moderately severe (15-19)

**GAD7 – ONLY ENTER Q 9-11 INTO SURVEYGIZMO**

| Over the last 2 weeks, how often have you been bothered by any of the following problems? | Not at all | Several days | More than half the days | Nearly every day |
|-------------------------------------------------------------------------------------------|------------|--------------|-------------------------|------------------|
| Feeling nervous, anxious, or on edge                                                      | 0          | 1            | 2                       | 3                |
| Not being able to stop or control worrying                                                | 0          | 1            | 2                       | 3                |
| Worrying too much about different things                                                  | 0          | 1            | 2                       | 3                |
| Trouble relaxing                                                                          | 0          | 1            | 2                       | 3                |

|                                                                                                                                                                      |                                               |                                             |                                         |                                              |
|----------------------------------------------------------------------------------------------------------------------------------------------------------------------|-----------------------------------------------|---------------------------------------------|-----------------------------------------|----------------------------------------------|
| Being so restless that it's hard to sit still                                                                                                                        | 0                                             | 1                                           | 2                                       | 3                                            |
| Becoming easily annoyed or irritable                                                                                                                                 | 0                                             | 1                                           | 2                                       | 3                                            |
| Feeling afraid as if something awful might happen                                                                                                                    | 0                                             | 1                                           | 2                                       | 3                                            |
| 26. If you checked off any problems, how difficult have these problems made it for you to do your work, take care of things at home, or get along with other people? | <input type="checkbox"/> Not at all difficult | <input type="checkbox"/> Somewhat difficult | <input type="checkbox"/> Very difficult | <input type="checkbox"/> Extremely difficult |
| 27. TOTAL GAD7 SCORE                                                                                                                                                 |                                               |                                             |                                         |                                              |
| 28. GAD7 Interpretation                                                                                                                                              | <input type="checkbox"/> Mild (5-9)           | <input type="checkbox"/> Moderate (10-14)   | <input type="checkbox"/> Severe (15+)   |                                              |

### PARTICIPANT REFLECTION - EVERYONE

|                                                                                  |                                                                                                                                                                                                                                                                                                                                                                                                                                                                                                                                                                                                                                                                |                                   |                                 |                                |
|----------------------------------------------------------------------------------|----------------------------------------------------------------------------------------------------------------------------------------------------------------------------------------------------------------------------------------------------------------------------------------------------------------------------------------------------------------------------------------------------------------------------------------------------------------------------------------------------------------------------------------------------------------------------------------------------------------------------------------------------------------|-----------------------------------|---------------------------------|--------------------------------|
| 29. How big of a barrier were the following in your quit attempt?                |                                                                                                                                                                                                                                                                                                                                                                                                                                                                                                                                                                                                                                                                |                                   |                                 |                                |
| A. Other smokers in life/people smoking around you                               | <input type="checkbox"/> Not at all                                                                                                                                                                                                                                                                                                                                                                                                                                                                                                                                                                                                                            | <input type="checkbox"/> Small    | <input type="checkbox"/> Medium | <input type="checkbox"/> Large |
| B. Smoking to cope with stress                                                   | <input type="checkbox"/> Not at all                                                                                                                                                                                                                                                                                                                                                                                                                                                                                                                                                                                                                            | <input type="checkbox"/> Small    | <input type="checkbox"/> Medium | <input type="checkbox"/> Large |
| C. Smoking to manage mental health symptoms                                      | <input type="checkbox"/> Not at all                                                                                                                                                                                                                                                                                                                                                                                                                                                                                                                                                                                                                            | <input type="checkbox"/> Small    | <input type="checkbox"/> Medium | <input type="checkbox"/> Large |
| D. Low motivation                                                                | <input type="checkbox"/> Not at all                                                                                                                                                                                                                                                                                                                                                                                                                                                                                                                                                                                                                            | <input type="checkbox"/> Small    | <input type="checkbox"/> Medium | <input type="checkbox"/> Large |
| E. Lack of support                                                               | <input type="checkbox"/> Not at all                                                                                                                                                                                                                                                                                                                                                                                                                                                                                                                                                                                                                            | <input type="checkbox"/> Small    | <input type="checkbox"/> Medium | <input type="checkbox"/> Large |
| F. Take a break/alone time                                                       | <input type="checkbox"/> Not at all                                                                                                                                                                                                                                                                                                                                                                                                                                                                                                                                                                                                                            | <input type="checkbox"/> Small    | <input type="checkbox"/> Medium | <input type="checkbox"/> Large |
| G. Like it/feels good/tastes good                                                | <input type="checkbox"/> Not at all                                                                                                                                                                                                                                                                                                                                                                                                                                                                                                                                                                                                                            | <input type="checkbox"/> Small    | <input type="checkbox"/> Medium | <input type="checkbox"/> Large |
| H. Too accessible                                                                | <input type="checkbox"/> Not at all                                                                                                                                                                                                                                                                                                                                                                                                                                                                                                                                                                                                                            | <input type="checkbox"/> Small    | <input type="checkbox"/> Medium | <input type="checkbox"/> Large |
| I. Withdrawal symptoms                                                           | <input type="checkbox"/> Not at all                                                                                                                                                                                                                                                                                                                                                                                                                                                                                                                                                                                                                            | <input type="checkbox"/> Small    | <input type="checkbox"/> Medium | <input type="checkbox"/> Large |
| 30. How helpful were the following?                                              |                                                                                                                                                                                                                                                                                                                                                                                                                                                                                                                                                                                                                                                                |                                   |                                 |                                |
| A. Support from First Breath Quit Coach                                          | <input type="checkbox"/> Not at all                                                                                                                                                                                                                                                                                                                                                                                                                                                                                                                                                                                                                            | <input type="checkbox"/> A little | <input type="checkbox"/> Medium | <input type="checkbox"/> Very  |
| B. Support from Healthcare Provider                                              | <input type="checkbox"/> Not at all                                                                                                                                                                                                                                                                                                                                                                                                                                                                                                                                                                                                                            | <input type="checkbox"/> A little | <input type="checkbox"/> Medium | <input type="checkbox"/> Very  |
| C. Home Visits                                                                   | <input type="checkbox"/> Not at all                                                                                                                                                                                                                                                                                                                                                                                                                                                                                                                                                                                                                            | <input type="checkbox"/> A little | <input type="checkbox"/> Medium | <input type="checkbox"/> Very  |
| D. Carbon Monoxide Breath Test                                                   | <input type="checkbox"/> Not at all                                                                                                                                                                                                                                                                                                                                                                                                                                                                                                                                                                                                                            | <input type="checkbox"/> A little | <input type="checkbox"/> Medium | <input type="checkbox"/> Very  |
| E. Gift Cards                                                                    | <input type="checkbox"/> Not at all                                                                                                                                                                                                                                                                                                                                                                                                                                                                                                                                                                                                                            | <input type="checkbox"/> A little | <input type="checkbox"/> Medium | <input type="checkbox"/> Very  |
| F. Handouts/Information                                                          | <input type="checkbox"/> Not at all                                                                                                                                                                                                                                                                                                                                                                                                                                                                                                                                                                                                                            | <input type="checkbox"/> A little | <input type="checkbox"/> Medium | <input type="checkbox"/> Very  |
| G. Weekly Text Messages from First Breath                                        | <input type="checkbox"/> Not at all                                                                                                                                                                                                                                                                                                                                                                                                                                                                                                                                                                                                                            | <input type="checkbox"/> A little | <input type="checkbox"/> Medium | <input type="checkbox"/> Very  |
| H. Wisconsin Tobacco Quit line                                                   | <input type="checkbox"/> Not at all                                                                                                                                                                                                                                                                                                                                                                                                                                                                                                                                                                                                                            | <input type="checkbox"/> A little | <input type="checkbox"/> Medium | <input type="checkbox"/> Very  |
| 31. Which of the following strategies did you find useful in your quit attempts? | <input type="checkbox"/> Reduced stress level<br><input type="checkbox"/> Increased support from others in life<br><input type="checkbox"/> Focused on reasons for quitting (baby, health, \$, etc)<br><input type="checkbox"/> Self-talk/staying positive<br><input type="checkbox"/> Avoided smokers<br><input type="checkbox"/> Avoided triggers<br><input type="checkbox"/> Used substitutes to deal with cravings (gum, candy, food)<br><input type="checkbox"/> Used distraction to deal with cravings (kids, physical activity, staying "busy")<br><input type="checkbox"/> Set and worked toward goals<br><input type="checkbox"/> Changed environment |                                   |                                 |                                |

### PARTICIPANT REFLECTION – FULLY QUIT ONLY

|                                                                                                 |                                                                        |                                                  |
|-------------------------------------------------------------------------------------------------|------------------------------------------------------------------------|--------------------------------------------------|
| 32. Did you reduce/cut back before you completely stopped? Or did you stop all at once?         | <input type="checkbox"/> Reduce/cut back before you completely stopped | <input type="checkbox"/> Stopped all at once     |
| 33. Did you use quit smoking medication?                                                        | <input type="checkbox"/> Yes and it helped                             | <input type="checkbox"/> Yes, but it didn't help |
|                                                                                                 | <input type="checkbox"/> No                                            |                                                  |
| 34. Would you like to share your quit smoking story with others (written or video testimonial)? | <input type="checkbox"/> Yes                                           |                                                  |
|                                                                                                 | <input type="checkbox"/> No                                            |                                                  |

| GIFT CARDS                                                                                     |             |                                                                          |
|------------------------------------------------------------------------------------------------|-------------|--------------------------------------------------------------------------|
| Tracking #                                                                                     | Gift Card # | Reason                                                                   |
|                                                                                                |             | HV3                                                                      |
|                                                                                                |             | HV3-CO                                                                   |
| CASE SUMMARY –HE DOCUMENTATION AFTER VISIT                                                     |             |                                                                          |
| 1. Total minutes of counseling                                                                 |             | _____ minutes                                                            |
| 2. Total contacts completed                                                                    |             | Home Visits: _____<br>Phone Calls: _____<br>Texts: _____<br>TOTAL: _____ |
| 3. Participant engagement level                                                                |             | A. Low<br>B. Medium<br>C. High                                           |
| 4. Difficulty level to reach/complete appointments                                             |             | A. Easy<br>B. Medium<br>C. High                                          |
| 5. Number of times physical address changed                                                    |             | A. 0<br>B. 1-2<br>C. 3 or more                                           |
| 6. HE Interaction with support people/other household smokers                                  |             | A. Low<br>B. Medium<br>C. High                                           |
| 7. Number of adult smokers received education from HE                                          |             | #                                                                        |
| 8. Number of contacts (>5 mins, addressed smoking) with other adult smokers in home/pt's life? |             | #                                                                        |
